# Supplementary material for: Novel Structural Insight into Inhibitors of Heme Oxygenase-1 (HO-1) by New Imidazole-Based Compounds: Biochemical and In Vitro Anticancer Activity Evaluation
Source: Molecules. 2018 May 18;23(5):1209. doi: 10.3390/molecules23051209 (PMC6099553; doi:10.3390/molecules23051209)
Supplement: Supplementary file 1 [file molecules-23-01209-s001.pdf]

Supplementary Informations

# Novel structural insight into inhibitors of Heme Oxygenase-1 (HO-1) by new imidazole-based compounds: biochemical and in vitro anticancer activity evaluation

Khaled F. Greish <sup>1</sup>, Loredana Salerno <sup>2,\*</sup>, Reem Al Zahrani <sup>1</sup>, Emanuele Amata <sup>2</sup>, Maria N. Modica <sup>2</sup>, Giuseppe Romeo <sup>2</sup>, Agostino Marrazzo <sup>2</sup>, Orazio Prezzavento <sup>2</sup>, Valeria Sorrenti <sup>2</sup>, Antonio Rescifina <sup>2</sup>, Giuseppe Floresta <sup>2,3,\*</sup>, Sebastiano Intagliata <sup>4</sup>, Valeria Pittalà <sup>2</sup>

<sup>1</sup> Department of Molecular Medicine, College of Medicine and Medical Sciences, Princess Al-Jawhara Centre for Molecular Medicine, Arabian Gulf University, Manama, Kingdom of Bahrain

<sup>2</sup> Department of Drug Sciences, University of Catania, V.le A. Doria 6, 95125 Catania, Italy

<sup>3</sup> Department of Chemical Sciences, University of Catania, V.le A. Doria, 95125 Catania, Italy

<sup>4</sup> Department of Medicinal Chemistry, College of Pharmacy, University of Florida, Gainesville, FL, USA

\* Correspondence: [giuseppe.floresta@unict.it](mailto:giuseppe.floresta@unict.it) (G.F.) and [l.salerno@unict.it](mailto:l.salerno@unict.it) (L.S.); Tel.: +39-095-738-4266

Received: date; Accepted: date; Published: date

## Table of contents

|                                                                       |    |
|-----------------------------------------------------------------------|----|
| Calibration curve of the free compound <b>1</b> at 272 nm (Figure S1) | S2 |
| Size distribution of SMA-1 (Figure S2)                                | S2 |
| 2D interaction and docked pose of compound <b>2</b> (Figure S3)       | S3 |
| 2D interaction and docked pose of compound <b>3</b> (Figure S4)       | S3 |
| 2D interaction and docked pose of compound <b>4</b> (Figure S5)       | S4 |
| NMR spectra of compounds <b>2–4</b>                                   | S5 |

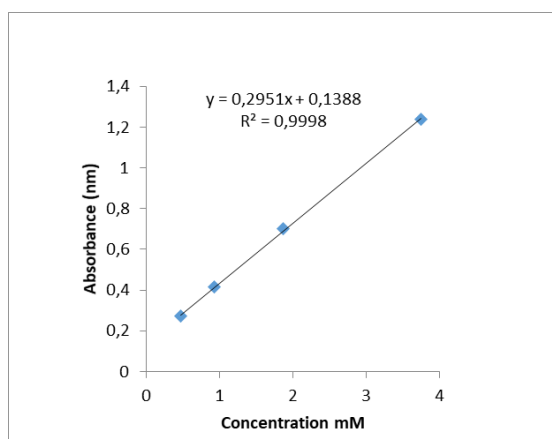

Figure S1. Calibration curve of the free compound 1 at 272 nm.

### Size Distribution Report by Intensity

v2.2

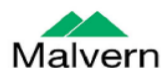

#### Sample Details

Sample Name: VP12-129 4/02/18 nd 1  
 SOP Name: Dr. Valeria Compounds.sop  
 General Notes:

|                            |                                                            |
|----------------------------|------------------------------------------------------------|
| File Name: tests.dts       | Dispersant Name: Water                                     |
| Record Number: 65          | Dispersant RI: 1.330                                       |
| Material RI: 1.59          | Viscosity (cP): 0.8872                                     |
| Material Absorption: 0.010 | Measurement Date and Time: Sunday, February 04, 2018 7:... |

#### System

|                                             |                                 |
|---------------------------------------------|---------------------------------|
| Temperature (°C): 25.0                      | Duration Used (s): 60           |
| Count Rate (kcps): 404.2                    | Measurement Position (mm): 4.65 |
| Cell Description: Disposable sizing cuvette | Attenuator: 11                  |

#### Results

|                                |                      |                            |              |                 |
|--------------------------------|----------------------|----------------------------|--------------|-----------------|
| Aggregation Index:             |                      | Size (d.nm):               | % Intensity: | St Dev (d.n...) |
| <b>Z-Average (d.nm): 180.6</b> | <b>Peak 1:</b> 224.3 | 100.0                      | 94.06        |                 |
| <b>Pdl: 0.211</b>              | <b>Peak 2:</b> 0.000 | 0.0                        | 0.000        |                 |
| <b>Intercept: 0.912</b>        | <b>Peak 3:</b> 0.000 | 0.0                        | 0.000        |                 |
| <b>Result quality: Good</b>    |                      | Concentration (%): 7.27e-6 |              |                 |

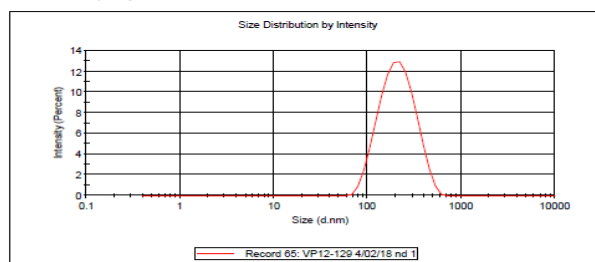

Figure S2. Size distribution of SMA-1 (the micelles are identified in the picture as VP12-129).

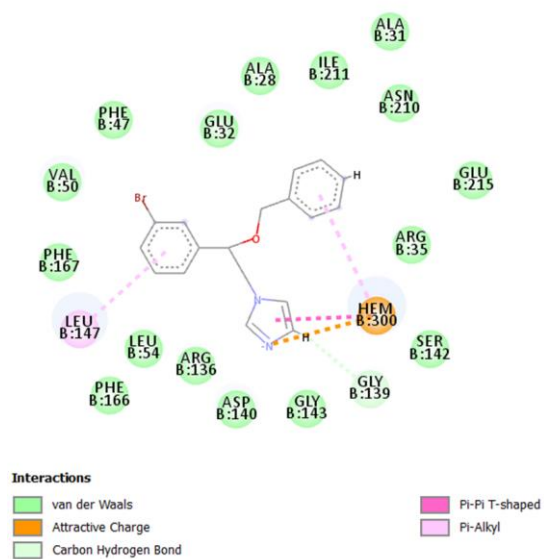

**Figure S3.** 2D interaction and docked pose of compound 2.

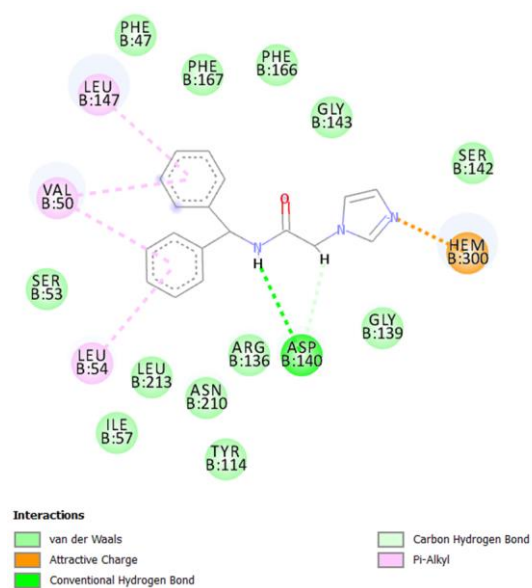

**Figure S4.** 2D interaction and docked pose of compound 3.

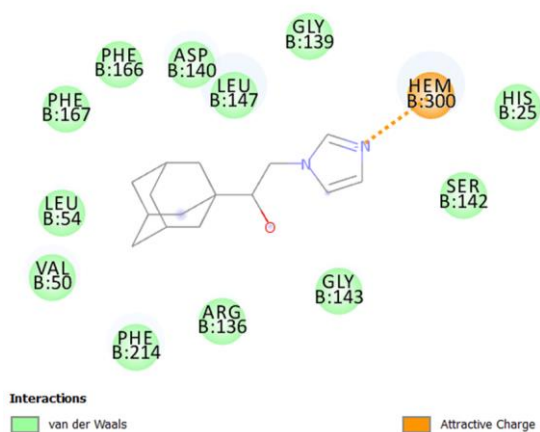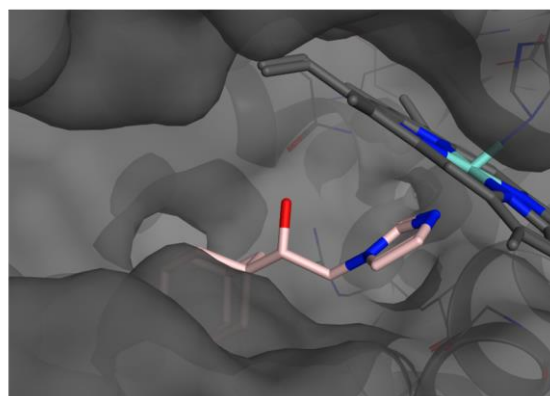

**Figure S5.** 2D interaction and docked pose of compound 4.

39

<sup>1</sup>H NMR of compound 2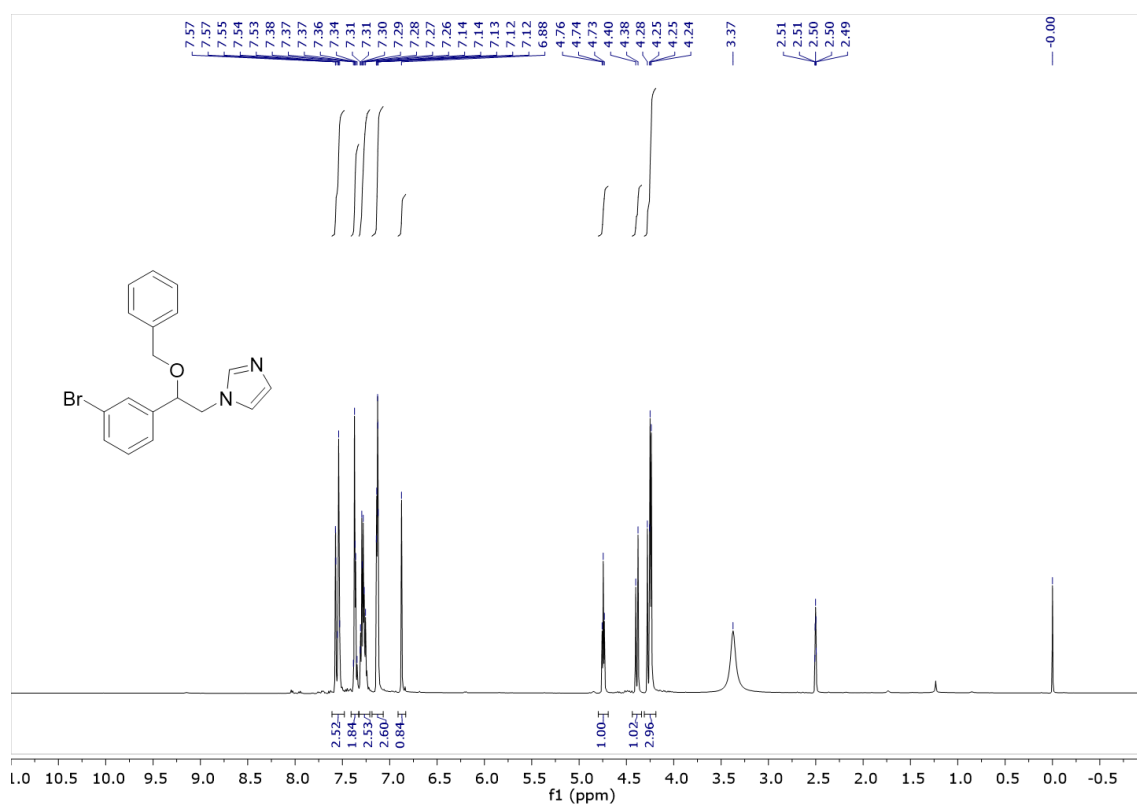

40

41

42

<sup>13</sup>C NMR of compound 2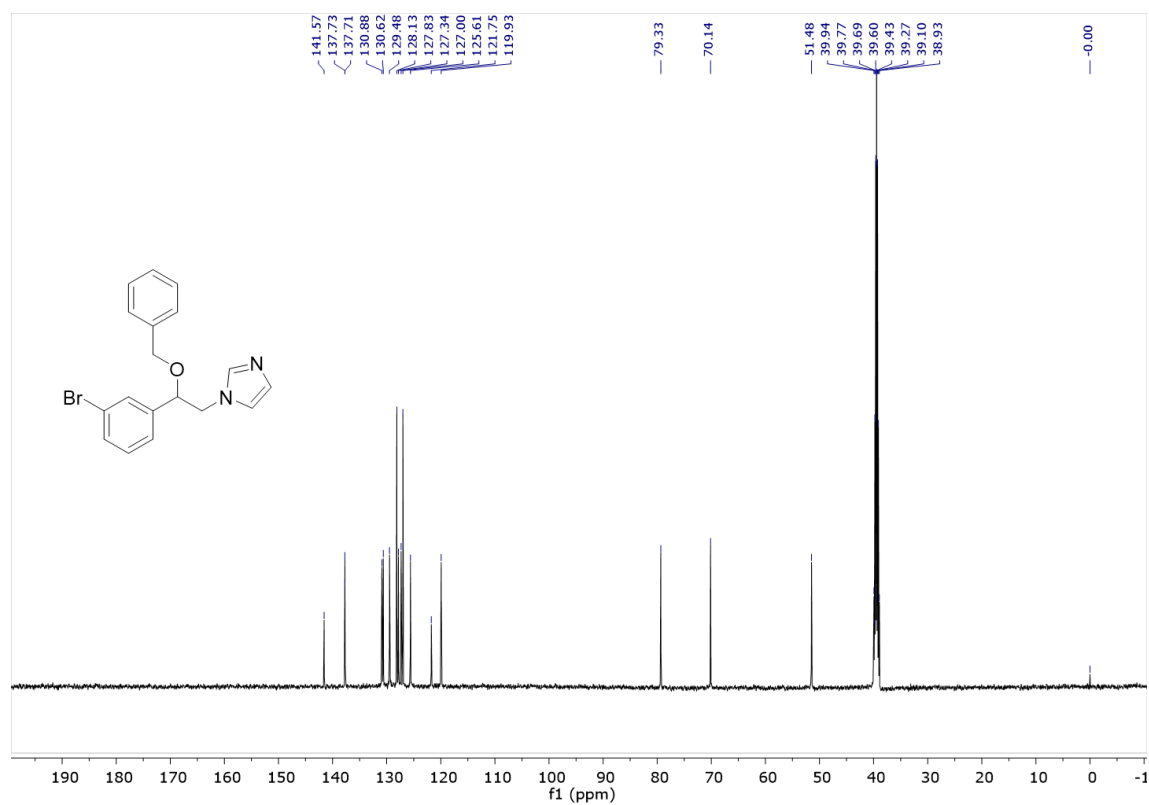

43

44

<sup>1</sup>H NMR of compound 3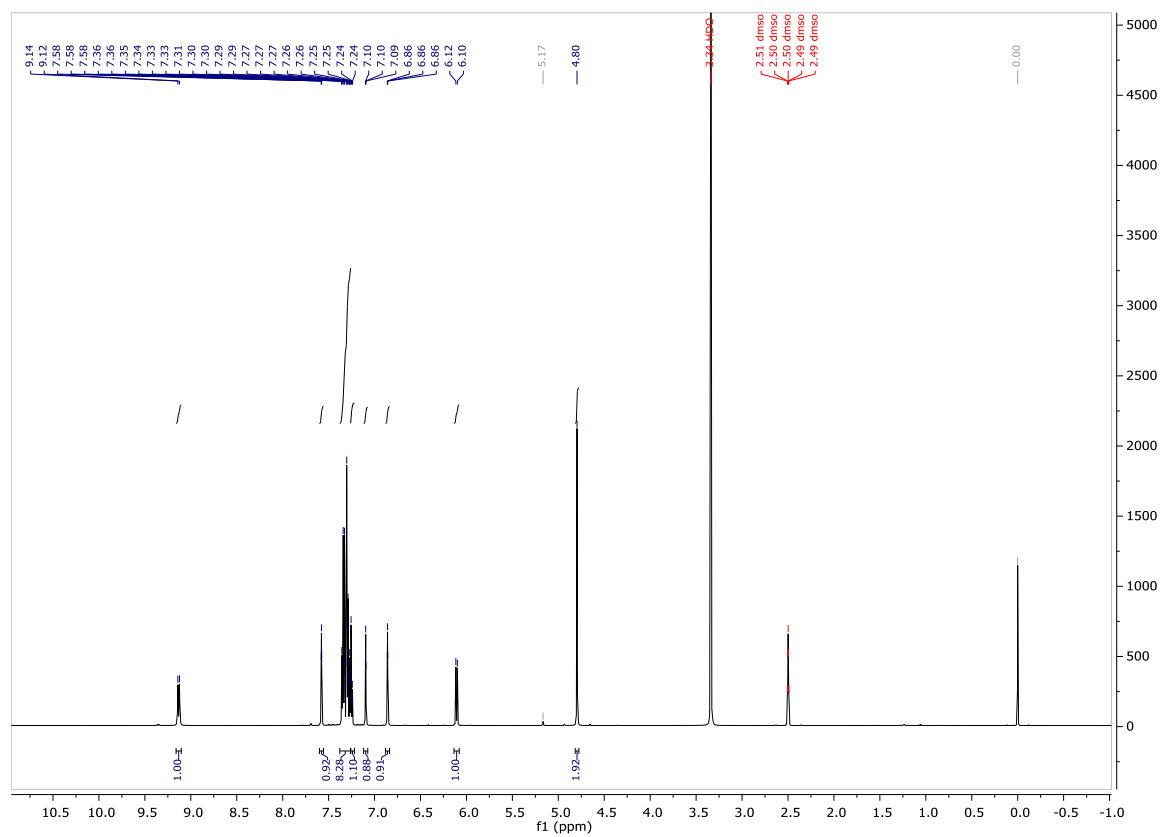<sup>13</sup>C NMR of compound 3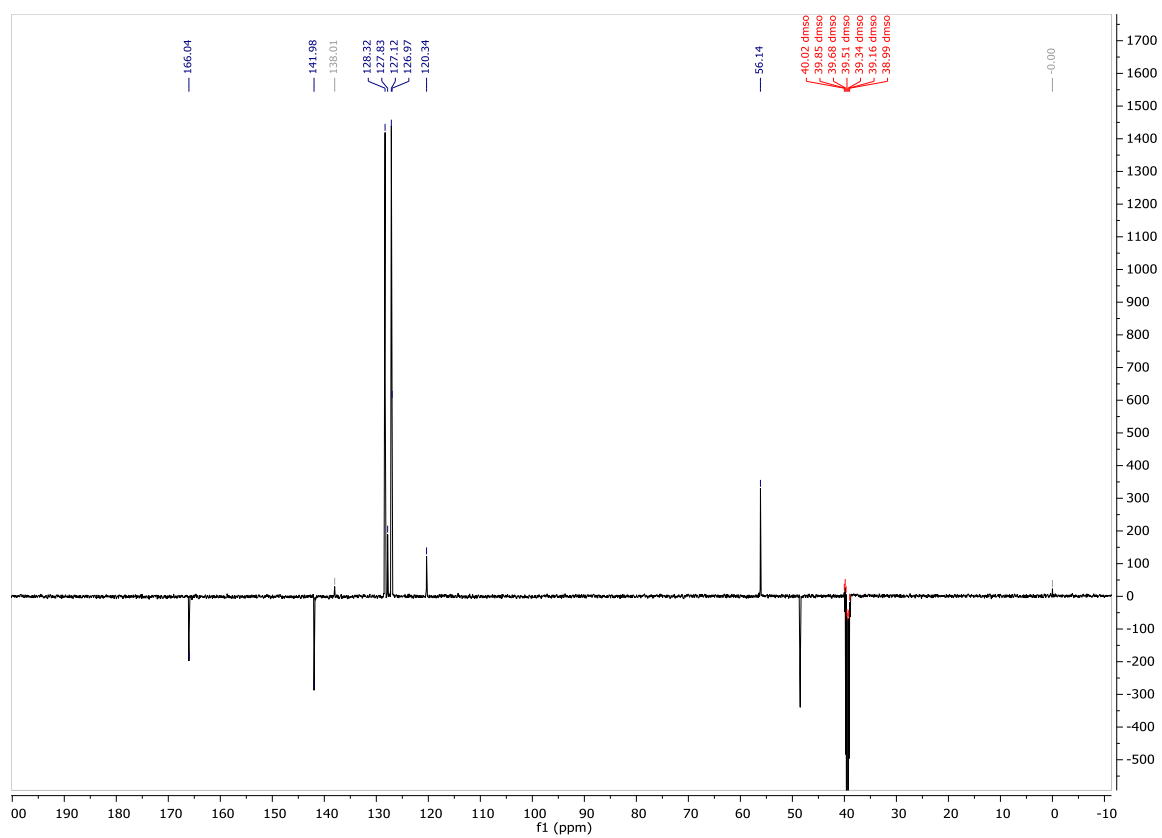

51

<sup>1</sup>H NMR of compound 4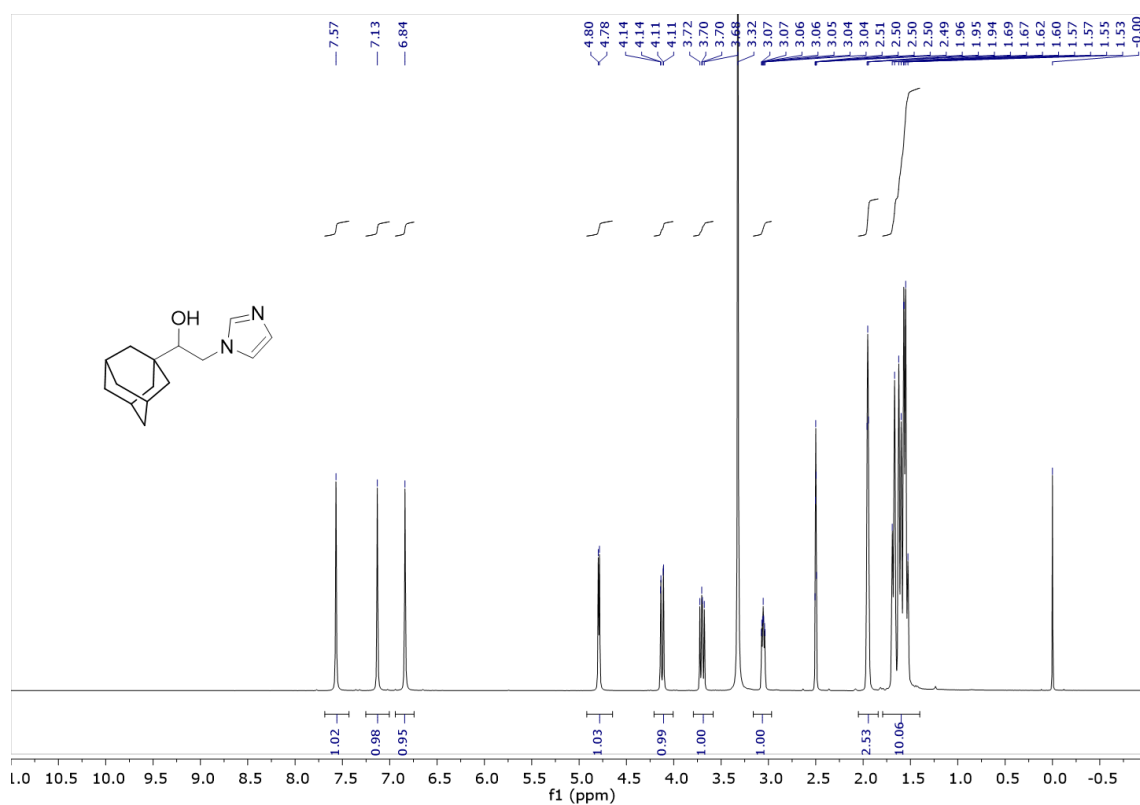

52

53

54

<sup>13</sup>C NMR of compound 4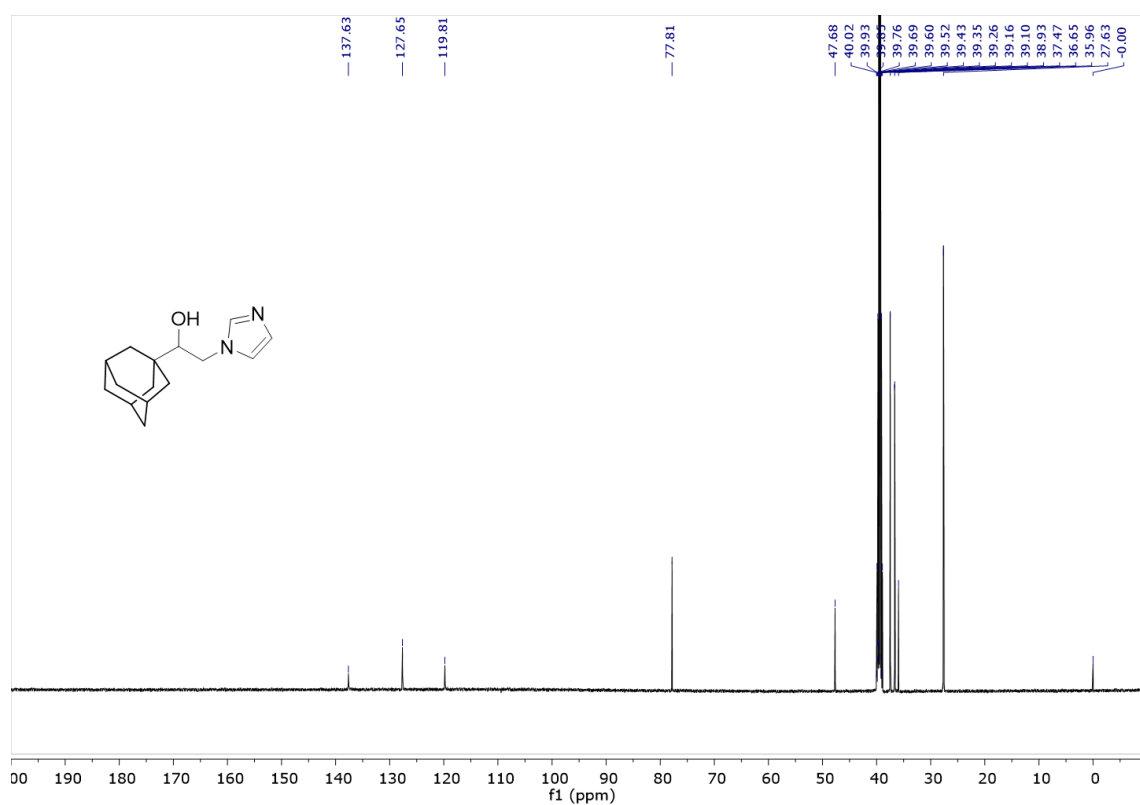

55

56 © 2018 by the authors. Submitted for possible open access publication under the terms and conditions of the Creative Commons Attribution (CC BY) license (<http://creativecommons.org/licenses/by/4.0/>).

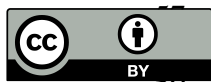

59
